# Supplementary material
Source: ML conference proceedings conference paper supplement (https://proceedings.neurips.cc/paper_files/paper/2013/hash/309928d4b100a5d75adff48a9bfc1ddb-Abstract.html)
Supplement: Supplementary file [file 309928d4b100a5d75adff48a9bfc1ddb-Supplemental.zip]

---

# Stochastic Gradient Riemannian Langevin Dynamics on the Probability Simplex —Supplementary Material—

---

**Sam Patterson**

Gatsby Computational Neuroscience Unit  
University College London  
spatterson@gatsby.ucl.ac.uk

**Yee Whye Teh**

Department of Statistics  
University of Oxford  
y.w.teh@stats.ox.ac.uk

| Algorithm | a    | b     | c   | $\alpha$ | $\beta$ | K  | Gibbs samples / Fixed-pt iterations |
|-----------|------|-------|-----|----------|---------|----|-------------------------------------|
| OVb       | 0.1  | 10000 | 0.7 | 0.01     | 0.01    | 50 | 5                                   |
| HSVG      | 0.1  | 1000  | 0.7 | 0.01     | 0.01    | 50 | 5                                   |
| SGRLD     | 0.05 | 1000  | 0.7 | 0.01     | 0.01    | 50 | 10                                  |

Table 1: Parameter settings for NIPS experiment.

| Algorithm | a     | b     | c   | $\alpha$ | $\beta$ | K   | Gibbs samples / Fixed-pt iterations |
|-----------|-------|-------|-----|----------|---------|-----|-------------------------------------|
| OVb       | 0.01  | 10000 | 0.6 | 0.01     | 0.1     | 100 | 100                                 |
| OVb       | 0.01  | 1000  | 0.6 | 0.01     | 0.1     | 100 | 200                                 |
| OVb       | 0.001 | 10000 | 0.6 | 0.01     | 0.1     | 100 | 100                                 |
| HSVG      | 0.001 | 10000 | 0.8 | 0.01     | 0.001   | 100 | 200                                 |
| HSVG      | 0.001 | 10000 | 0.6 | 0.01     | 0.1     | 100 | 200                                 |
| HSVG      | 0.001 | 10000 | 0.8 | 0.01     | 0.1     | 100 | 200                                 |
| SGRLD     | 0.001 | 10000 | 0.6 | 0.01     | 0.0001  | 100 | 200                                 |
| SGRLD     | 0.001 | 1000  | 0.6 | 0.01     | 0.0001  | 100 | 200                                 |
| SGRLD     | 0.001 | 1000  | 0.6 | 0.01     | 0.1     | 100 | 200                                 |

Table 2: Parameter settings for Wikipedia experiment.
